# Supplementary material for: Structural, optical, thermal, and computational insights into the 1D antimony-based hybrid perovskite (C10H13N4)[SbI4]·H2O
Source: Royal Society of Chemistry journal article supplement (doi:10.1039/d6ra02020h), 2026-05-05
Supplement: d6ra02020h1.pdf [file d6ra02020h1.pdf]

## Supplementary

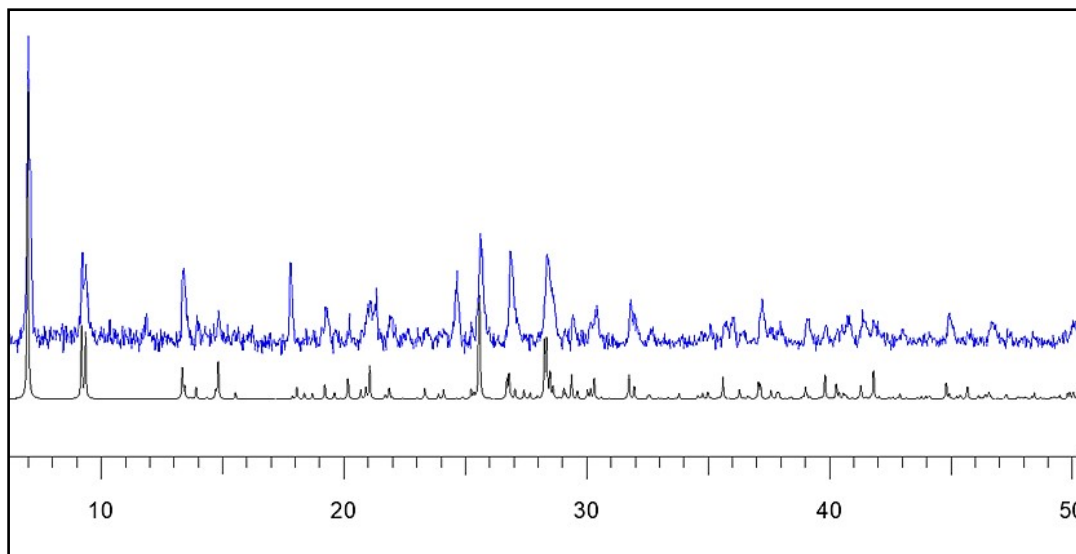

**Fig. 1.S:** Experimental (blue) vs calculated (black) peaks of PXR D

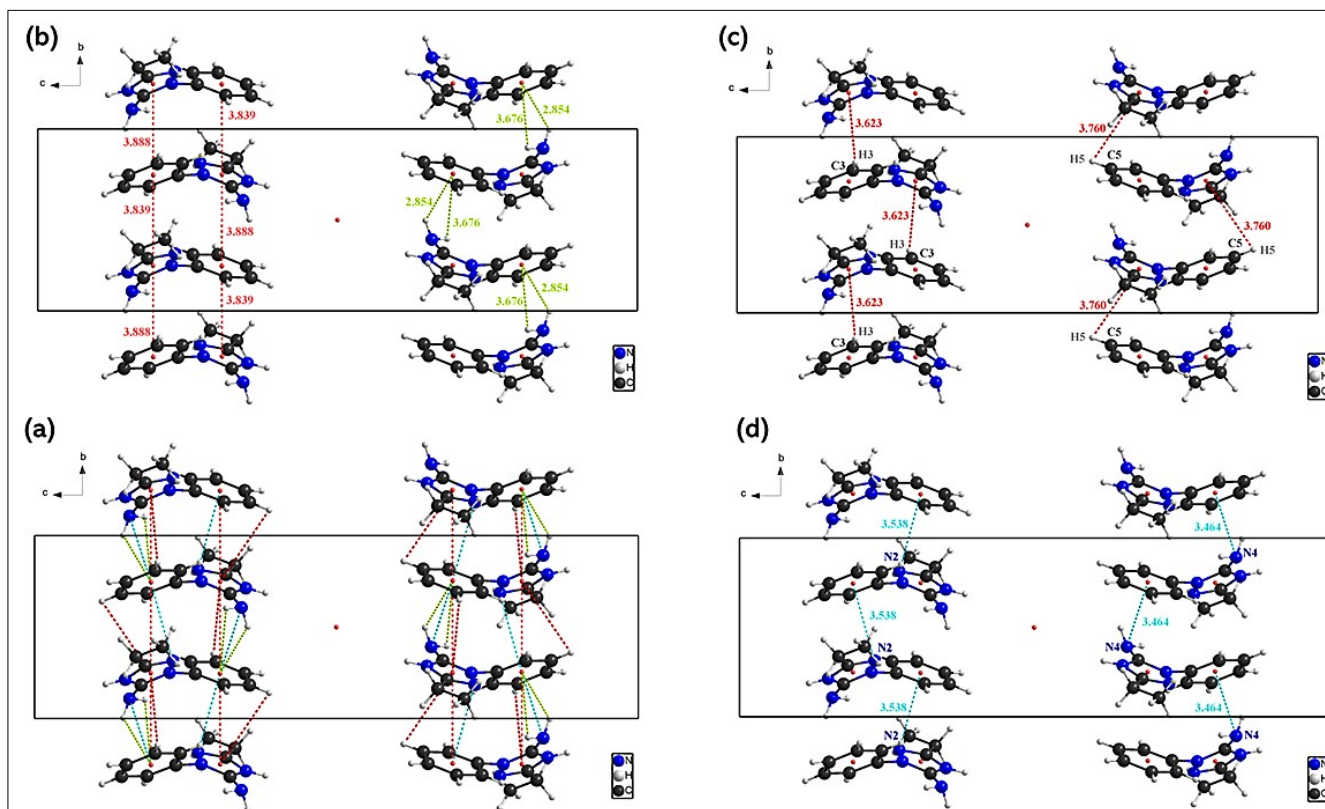

**Fig. 2.S:** (a) all types of  $\pi$  interactions, (b)  $\pi \cdots \pi$  and N-H  $\cdots \pi$  interactions, (c) C-H  $\cdots \pi$  interactions, (d) n  $\cdots \pi$  interactions, along the a-axis

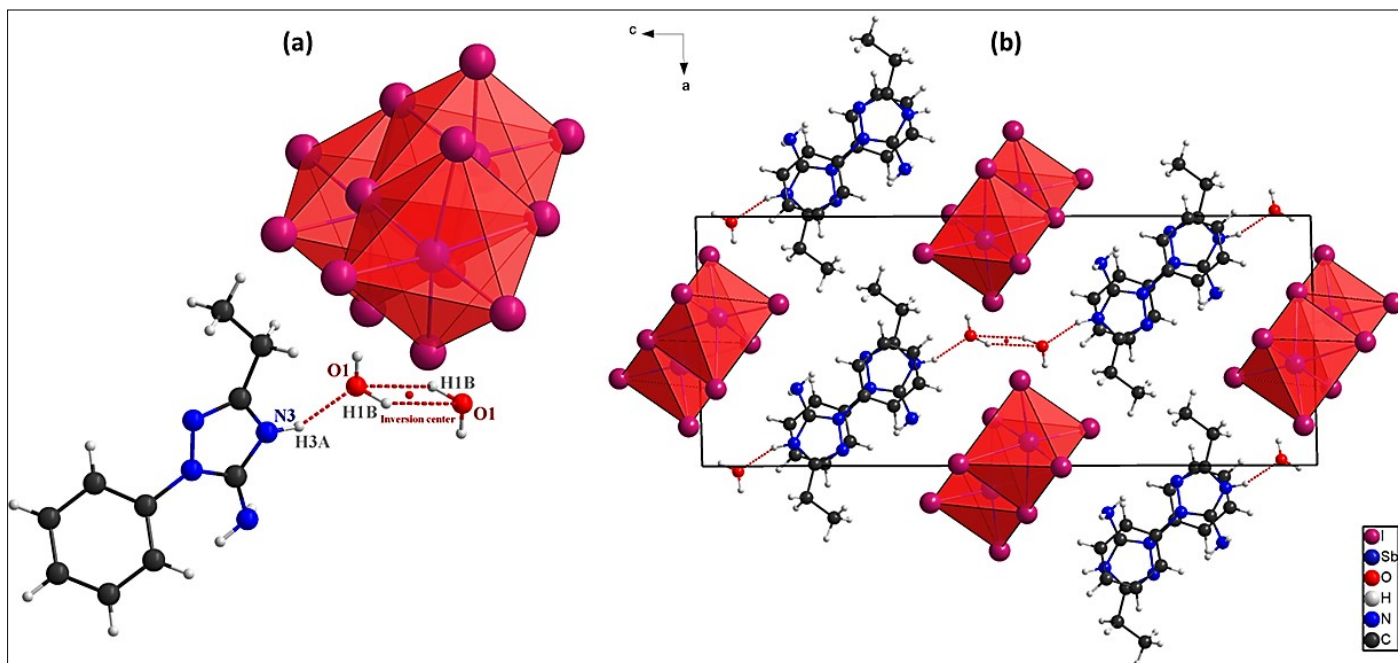

**Fig. 3.S:** Hydrogen bonding of the titled compound ((a) in the formula unit, and (b) the unit cell)

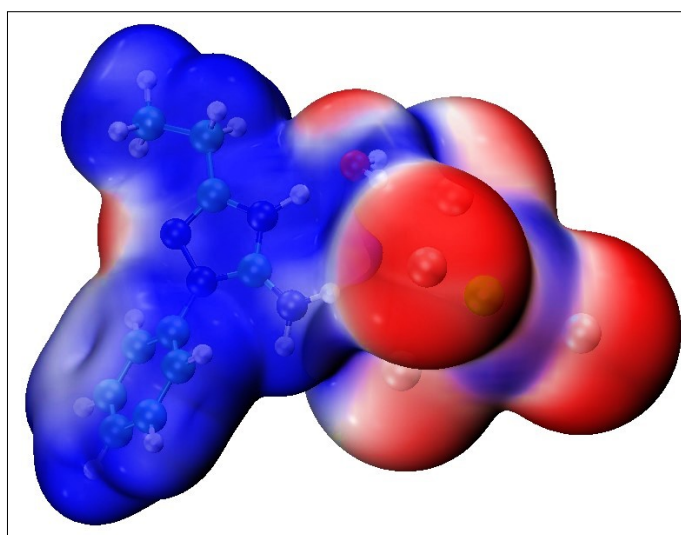

**Fig. 4.S:** Molecular Electrostatic Potential Analysis of the Target Compound

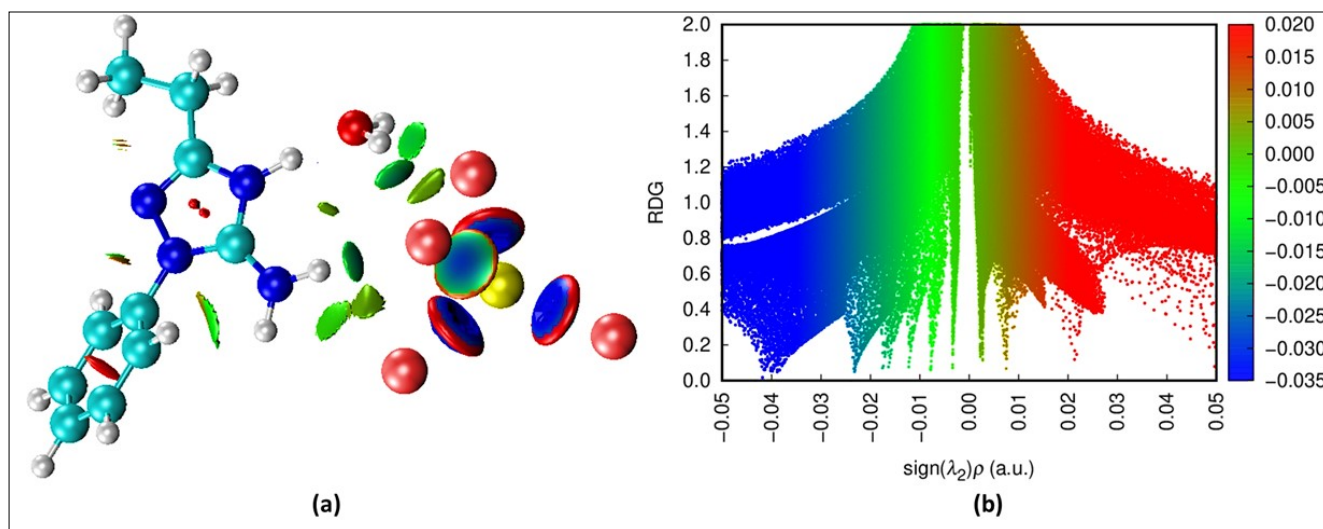

**Fig. 5.S:** (a) NCI and (b) RDG Visualization of the Target Compound

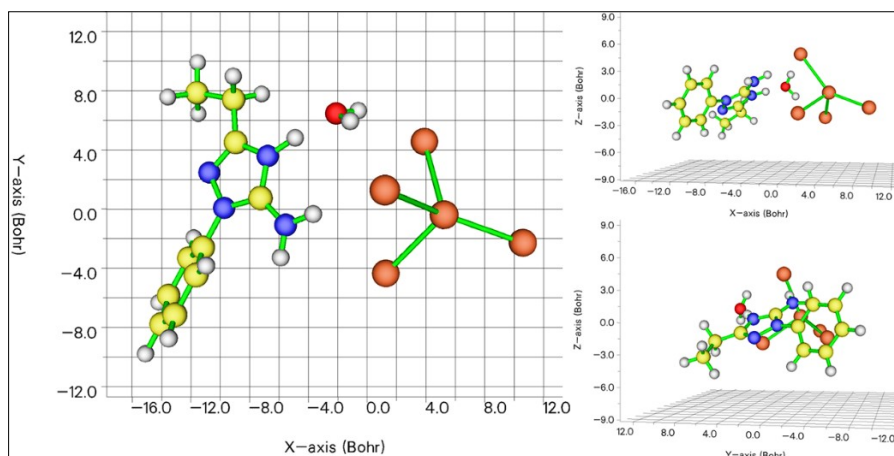

**Fig. 6.S:** Visualization in (XY), (XZ), and (YZ) planes

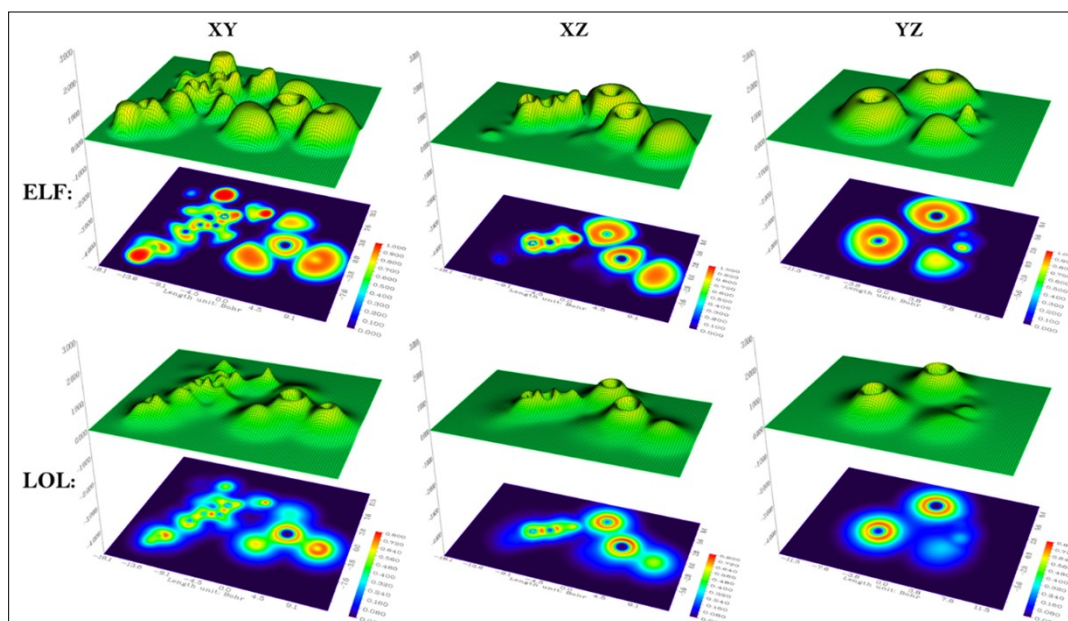

**Fig. 7.S:** Electron Localization Function (ELF) and LOL analyses

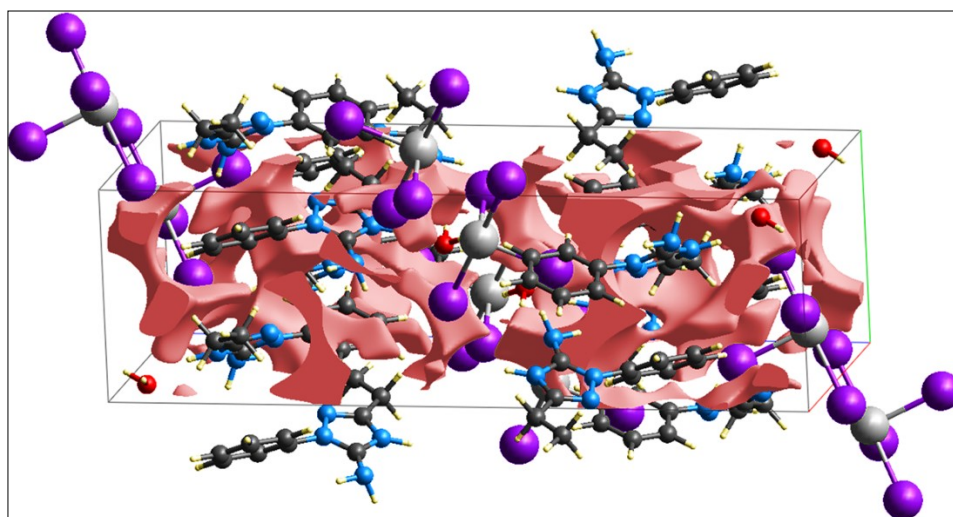

**Fig. 8.S:** Presence of a Crystal Void in the Compound

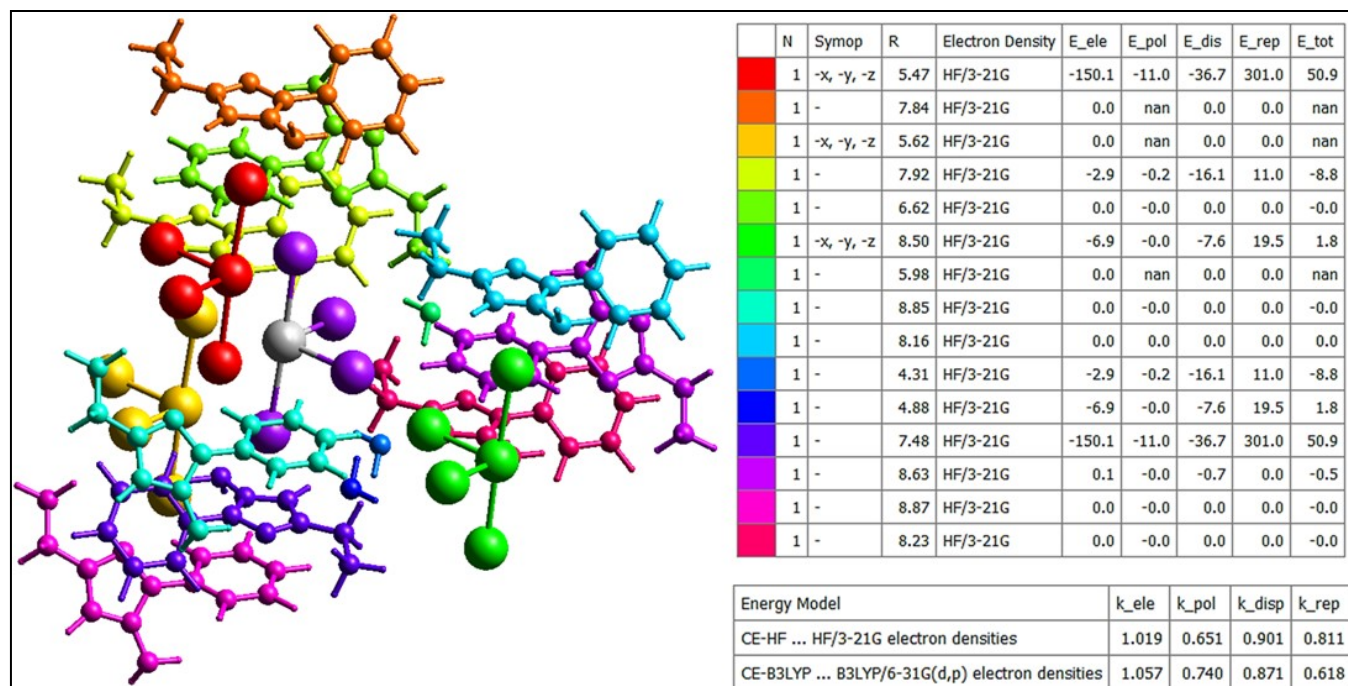

Fig. 9.S: Energy Framework Analysis of Intermolecular Interactions

Table 1.S: The attributions of calculated and observed frequencies of the vibration modes of the compound

| IR (cm <sup>-1</sup> ) | Raman (cm <sup>-1</sup> ) | Calc. wavenumbers (cm <sup>-1</sup> ) | Assignment                                   |
|------------------------|---------------------------|---------------------------------------|----------------------------------------------|
| 3556                   | -                         | 3576                                  | $\nu_{as}(\text{NH}_2)$                      |
| 3427                   | -                         | 3426                                  | $\nu_s(\text{H}_2\text{O})$                  |
| 3362                   | -                         | 3268                                  | $\nu_s(\text{NH}_2)$                         |
| 3129                   | -                         | 3129                                  | $\nu_{as}(\text{C-H})$                       |
| 3052                   | -                         | 3056                                  | $\nu_s(\text{C-H}) + \nu_{as}(\text{CH}_3)$  |
| 2965                   | -                         | 2966                                  | $\nu_s(\text{CH}_3) + \nu_{as}(\text{CH}_2)$ |
| 1800-2800              | -                         | 2539                                  | $\nu(\text{N-H} \dots \text{O})$             |
| 1668                   | -                         | 1633                                  | $\delta(\text{H-O-H}) + \delta(\text{NH}_2)$ |
| 1582                   | -                         | 1565                                  | $\nu(\text{C=C}) + \delta(\text{CH}_2)$      |
| 1491                   | -                         | 1462                                  | $\omega(\text{CH}_3)$                        |
| 1453                   | -                         | 1427                                  | $\gamma(\text{CH}_3)$                        |
| 1168                   | -                         | 1168                                  | $\nu(\text{C-C})$                            |
| 1017                   | -                         | 1001                                  | $\omega(\text{NH}_2)$                        |
| 941                    | -                         | 938                                   | $\beta(\text{C-H})$                          |
| 849                    | -                         | 870                                   | $\gamma(\text{C-H})$                         |
| 754                    | -                         | 714                                   | $\omega(\text{H-O-H})$                       |
| 668                    | -                         | 634                                   | $\delta(\text{H-O-H})$                       |
| 556                    | -                         | 551                                   | $\rho(\text{C-C-C})$                         |
| -                      | -                         | 293                                   | $\nu_{as}(\text{Sb-I})$                      |

|   |            |            |                                                |
|---|------------|------------|------------------------------------------------|
| - | <b>159</b> | <b>142</b> | <b><math>\nu_s(\text{Sb-I})</math></b>         |
| - | <b>108</b> | <b>106</b> | <b><math>\delta_{as}(\text{I-Sb-I})</math></b> |
| - | <b>86</b>  | <b>92</b>  | <b><math>\delta_s(\text{I-Sb-I})</math></b>    |
| - | <b>60</b>  | <b>59</b>  | <b>Lattice mode</b>                            |

$\nu_s$  :symmetric stretching,  $\nu_{as}$  :asymmetric stretching,  $\beta$  : in plane bending,  $\gamma$  :out plane bending,  $\delta$  :scissoring,  $\rho$  :rocking

$\omega$ :wagging,  $\tau$  : Twisting
